# Supplementary material
Source: PubMed Central journal article supplement (PMC552911)
Supplement: pnas_102_9_3423__2.pdf [file pnas_102_9_3423__2.pdf]

| Number of Different SAGE Tags | P1mon | P2mon | C1mon | A1mon | A2mon | P1nonmon | A1nonmon | Description                                                                                                      | Unigene | P-value for P1 | P-value for P2 | P1mon/C1mon | P2mon/C1mon | Total Tags |
|-------------------------------|-------|-------|-------|-------|-------|----------|----------|------------------------------------------------------------------------------------------------------------------|---------|----------------|----------------|-------------|-------------|------------|
| 5                             | 29    | 76    | 1     | 1     | 42    | 18       | 20       | napsin B pseudogene                                                                                              | 322854  | 2.74868E-08    | 1.19064E-16    | 29          | 76          | 111        |
| 6                             | 6     | 10    |       | 5     | 10    | 8        | 4        | diazepam binding inhibitor (GABA receptor modulator, acyl-Coenzyme A binding protein)                            | 78888   | 0.015577782    | 0.006609552    | 12          | 20          | 26         |
| 7                             | 11    | 30    | 2     | 8     | 11    |          | 4        | ras homolog gene family, member B                                                                                | 406064  | 0.009475483    | 9.81737E-06    | 5.5         | 15          | 47         |
| 4                             | 6     | 14    | 1     | 7     | 12    | 6        | 10       | lymphoid-restricted membrane protein                                                                             | 124922  | 0.054555224    | 0.004165646    | 6           | 14          | 33         |
| 1                             | 26    | 6     |       | 10    | 15    | 8        | 8        | flightless 1 homolog (Drosophila)                                                                                | 531027  | 1.46774E-08    | 0.054748652    | 52          | 12          | 54         |
| 5                             | 10    | 12    | 1     | 15    | 10    | 28       | 32       | NADPH oxidase-related, C2 domain-containing protein                                                              | 25895   | 0.005345146    | 0.010490186    | 10          | 12          | 42         |
| 5                             | 8     | 12    | 1     | 10    | 7     | 4        | 12       | fibrillarin                                                                                                      | 99853   | 0.017514394    | 0.010490186    | 8           | 12          | 32         |
| 2                             | 7     | 10    | 1     | 8     | 4     | 2        |          | chromosome 9 open reading frame 83                                                                               | 415534  | 0.031155552    | 0.025877907    | 7           | 10          | 25         |
| 4                             | 5     | 10    | 1     | 11    | 9     | 10       | 10       | male-specific lethal 3-like 1 (Drosophila)                                                                       | 371233  | 0.093579863    | 0.025877907    | 5           | 10          | 31         |
| 11                            | 3     | 10    | 1     | 7     | 12    | 8        | 4        | mitogen-activated protein kinase-activated protein kinase 2                                                      | 75074   | 0.249848553    | 0.025877907    | 3           | 10          | 28         |
| 7                             | 9     | 8     | 1     | 5     | 10    | 14       | 14       | hypothetical protein FLJ13213                                                                                    | 190114  | 0.009724332    | 0.062064129    | 9           | 8           | 29         |
| 19                            | 111   | 138   | 19    | 27    | 11    | 8        | 4        | v-fos FBJ murine osteosarcoma viral oncogene homolog                                                             | 25647   | 2.0967E-17     | 7.33919E-17    | 5.842105263 | 7.263157895 | 237        |
| 5                             | 14    | 14    | 2     | 3     | 3     | 12       | 14       | chromosome 6 open reading frame 82                                                                               | 107187  | 0.001818903    | 0.012232092    | 7           | 7           | 29         |
| 5                             | 12    | 14    | 2     | 9     | 9     | 4        | 4        | PAP associated domain containing 4                                                                               | 220277  | 0.005524021    | 0.012232092    | 6           | 7           | 39         |
| 1                             | 8     | 14    | 2     | 3     | 7     | 6        | 4        | hypothetical protein FLJ14627                                                                                    | 347310  | 0.043812478    | 0.012232092    | 4           | 7           | 27         |
| 8                             | 7     | 6     | 1     | 8     | 12    | 30       | 10       | hypothetical protein FLJ20297                                                                                    | 94491   | 0.031155552    | 0.142897097    | 7           | 6           | 31         |
| 3                             | 12    | 12    | 2     | 5     | 5     | 10       | 8        | chromosome 20 open reading frame 6                                                                               | 369284  | 0.005524021    | 0.027380982    | 6           | 6           | 30         |
| 3                             | 10    | 12    | 2     | 4     | 6     | 2        | 6        | suppressor of Ty 4 homolog 1 (S. cerevisiae)                                                                     | 79058   | 0.016045141    | 0.027380982    | 5           | 6           | 28         |
| 4                             | 7     | 12    | 2     | 8     | 2     | 12       | 14       | diacylglycerol kinase, delta 130kDa                                                                              | 115907  | 0.070142406    | 0.027380982    | 3.5         | 6           | 25         |
| 7                             | 7     | 18    | 3     | 5     | 3     | 2        | 6        | chromosome 20 open reading frame 111                                                                             | 75798   | 0.116974743    | 0.005888996    | 2.333333333 | 6           | 27         |
| 23                            | 19    | 32    | 6     | 13    | 8     | 14       | 18       | zinc finger protein 216                                                                                          | 406096  | 0.005239783    | 0.000339314    | 3.166666667 | 5.333333333 | 62         |
| 1                             | 9     | 16    | 3     | 6     | 3     | 18       | 6        | hypothetical protein FLJ22814                                                                                    | 528682  | 0.05348565     | 0.012711455    | 3           | 3           | 29         |
| 7                             | 7     | 16    | 3     | 4     | 4     | 4        | 4        | SAR1a gene homolog 1 (S. cerevisiae)                                                                             | 110796  | 0.116974743    | 0.012711455    | 2.333333333 | 5.333333333 | 26         |
| 2                             | 5     | 16    | 3     | 3     | 7     | 2        | 4        | ethylmalonic encephalopathy 1                                                                                    | 7486    | 0.218617324    | 0.012711455    | 1.666666667 | 5.333333333 | 26         |
| 1                             | 12    | 10    | 2     | 4     | 4     | 10       | 8        | FLJ45744 protein                                                                                                 | 528491  | 0.005524021    | 0.059102118    | 6           | 5           | 27         |
| 1                             | 12    | 10    | 2     | 4     | 4     | 10       | 8        | hypothetical protein LOC339834                                                                                   | 383008  | 0.005524021    | 0.059102118    | 6           | 5           | 27         |
| 2                             | 12    | 10    | 2     | 4     | 4     | 10       | 10       | zinc finger protein 563                                                                                          | 345226  | 0.005524021    | 0.059102118    | 6           | 5           | 27         |
| 3                             | 7     | 10    | 2     | 8     | 7     | 2        | 2        | mitogen-activated protein kinase kinase kinase 1                                                                 | 170610  | 0.070142406    | 0.059102118    | 3.5         | 5           | 29         |
| 2                             | 45    | 70    | 14    | 11    | 6     | 32       | 20       | chemokine (C-X-C motif) receptor 4                                                                               | 421986  | 2.2654E-05     | 1.91133E-07    | 3.214285714 | 5           | 111        |
| 1                             | 6     | 10    | 2     | 7     | 6     | 2        | 6        | ARC/mediator transcriptional coactivator subunit                                                                 | 528688  | 0.109176466    | 0.059102118    | 3           | 5           | 26         |
| 7                             | 5     | 10    | 2     | 6     | 8     | 6        | 6        | ets variant gene 6 (TEL oncogene)                                                                                | 171262  | 0.163863846    | 0.059102118    | 2.5         | 5           | 26         |
| 9                             | 5     | 10    | 2     | 9     | 5     |          |          | pituitary tumor-transforming 1 interacting protein                                                               | 369026  | 0.163863846    | 0.059102118    | 2.5         | 5           | 26         |
| 7                             | 5     | 10    | 2     | 10    | 7     | 6        | 10       | ATPase, H+ transporting, lysosomal 31kDa, V1 subunit E isoform 1                                                 | 77805   | 0.163863846    | 0.059102118    | 2.5         | 5           | 29         |
| 1                             | 10    | 30    | 6     | 3     | 4     | 2        | 2        | sin3-associated polypeptide, 30kDa                                                                               | 512813  | 0.121970405    | 0.00710217     | 1.666666667 | 5           | 38         |
| 13                            | 7     | 14    | 3     | 7     | 8     | 4        | 4        | stabilin 1                                                                                                       | 301989  | 0.116974743    | 0.026606351    | 2.333333333 | 4.666666667 | 32         |
| 6                             | 5     | 14    | 3     | 8     | 9     | 2        | 2        | small membrane protein 1                                                                                         | 107979  | 0.218617324    | 0.026606351    | 1.666666667 | 4.666666667 | 32         |
| 5                             | 13    | 18    | 4     | 9     | 16    | 24       | 26       | integrin, alpha L (antigen CD11A (p180), lymphocyte function-associated antigen 1; alpha polypeptide)            | 174103  | 0.018070219    | 0.01248908     | 3.25        | 4.5         | 51         |
| 9                             | 14    | 36    | 8     | 8     | 14    | 22       | 32       | chromosome 6 open reading frame 32                                                                               | 389488  | 0.076008493    | 0.000365233    | 1.75        | 4.5         | 62         |
| 9                             | 6     | 18    | 4     | 3     | 9     | 10       | 8        | Clone IMAGE:5285814, mRNA                                                                                        | 200222  | 0.204953666    | 0.01248908     | 1.5         | 4.5         | 31         |
| 2                             | 8     | 22    | 5     | 6     | 6     | 4        | 4        | formin binding protein 1                                                                                         | 440808  | 0.156914091    | 0.006010732    | 1.6         | 4.4         | 36         |
| 8                             | 15    | 30    | 7     | 26    | 6     | 26       | 10       | chromobox homolog 3 (HP1 gamma homolog, Drosophila)                                                              | 381189  | 0.040488837    | 0.001456538    | 2.142857143 | 4.285714286 | 69         |
| 12                            | 26    | 2     |       | 45    | 37    | 54       | 52       | ribosomal protein S4, Y-linked                                                                                   | 180911  | 1.46774E-08    | 0.453464282    | 52          | 4           | 109        |
| 5                             | 23    | 16    | 4     | 8     | 10    | 46       | 56       | glutamyl-prolyl-tRNA synthetase                                                                                  | 171292  | 0.000129341    | 0.024884124    | 5.75        | 4           | 53         |
| 7                             | 16    | 16    | 4     | 6     | 11    | 2        | 4        | CDNA FLJ44273 fis, clone TOVAR2001281                                                                            | 142074  | 0.004589884    | 0.024884124    | 4           | 4           | 45         |
| 8                             | 8     | 8     | 2     | 9     | 8     | 2        | 2        | CD33 antigen (gp67)                                                                                              | 83731   | 0.043812478    | 0.121497618    | 4           | 4           | 31         |
| 7                             | 11    | 12    | 3     | 8     | 8     | 2        | 2        | RAB2, member RAS oncogene family                                                                                 | 78305   | 0.022122838    | 0.053601399    | 3.666666667 | 4           | 36         |
| 2                             | 12    | 16    | 4     | 5     | 3     |          |          | Transcribed sequence with weak similarity to protein ref:NP_071385.1 (H.sapiens) hypothetical protein FLJ20958   | 77542   | 0.027653538    | 0.024884124    | 3           | 4           | 32         |
| 5                             | 9     | 12    | 3     | 10    | 3     | 10       | 16       | a disintegrin and metalloproteinase domain 8                                                                     | 86947   | 0.05348565     | 0.053601399    | 3           | 4           | 31         |
| 3                             | 6     | 8     | 2     | 8     | 6     | 18       | 8        | radical fringe homolog (Drosophila)                                                                              | 12862   | 0.109176466    | 0.121497618    | 3           | 4           | 26         |
| 1                             | 14    | 20    | 5     | 11    | 11    | 18       | 14       | small nuclear ribonucleoprotein D2 polypeptide 16.5kDa                                                           | 424327  | 0.022071474    | 0.011893039    | 2.8         | 4           | 51         |
| 1                             | 8     | 12    | 3     | 7     | 8     | 10       | 4        | HSPC038 protein                                                                                                  | 449945  | 0.080371477    | 0.053601399    | 2.666666667 | 4           | 32         |
| 1                             | 15    | 24    | 6     | 8     | 11    | 14       | 28       | tripartite motif-containing 52                                                                                   | 458412  | 0.025750044    | 0.005792011    | 2.5         | 4           | 52         |
| 8                             | 10    | 16    | 4     | 14    | 11    | 6        | 6        | solute carrier family 20 (phosphate transporter), member 1                                                       | 110855  | 0.060911471    | 0.024884124    | 2.5         | 4           | 47         |
| 3                             | 7     | 12    | 3     | 7     | 6     | 4        | 2        | transmembrane protein 14C                                                                                        | 30376   | 0.116974743    | 0.053601399    | 2.333333333 | 4           | 29         |
| 5                             | 7     | 12    | 3     | 9     | 3     | 10       | 22       | CDNA FLJ13267 fis, clone OVARC1000964                                                                            | 57079   | 0.116974743    | 0.053601399    | 2.333333333 | 4           | 28         |
| 6                             | 11    | 20    | 5     | 7     | 6     | 12       | 12       | Similar to RIKEN cDNA 181003717 (LOC401152), mRNA                                                                | 173705  | 0.066448853    | 0.011893039    | 2.2         | 4           | 39         |
| 1                             | 6     | 12    | 3     | 8     | 9     | 12       | 12       | ATP synthase, H+ transporting, mitochondrial F1 complex, O subunit (oligomycin sensitivity conferring protein)   | 409140  | 0.163863786    | 0.053601399    | 2           | 4           | 32         |
| 7                             | 5     | 12    | 3     | 7     | 12    | 8        | 14       | periplin 1                                                                                                       | 371140  | 0.218617324    | 0.053601399    | 1.666666667 | 4           | 33         |
| 5                             | 6     | 16    | 4     | 4     | 7     | 14       | 8        | STAR3 N-terminal like                                                                                            | 13467   | 0.204953666    | 0.024884124    | 4.5         | 4           | 29         |
| 13                            | 71    | 92    | 24    | 17    | 14    | 12       | 2        | dual specificity phosphatase 1                                                                                   | 171695  | 4.80602E-07    | 1.23891E-07    | 2.958333333 | 3.833333333 | 172        |
| 6                             | 17    | 30    | 8     | 8     | 12    | 16       | 28       | MRS2-like, magnesium homeostasis factor (S. cerevisiae)                                                          | 146030  | 0.032077647    | 0.002732534    | 2.125       | 3.75        | 60         |
| 2                             | 14    | 30    | 8     | 13    | 8     | 14       | 6        | proteasome (prosome, macropain) 26S subunit, non-ATPase, 4                                                       | 505059  | 0.076008493    | 0.002732534    | 1.75        | 3.75        | 58         |
| 6                             | 14    | 22    | 6     | 7     | 10    |          |          | Fc fragment of IgG, high affinity Ia, receptor for (CD64)                                                        | 77424   | 0.036808048    | 0.011112989    | 2.333333333 | 3.666666667 | 48         |
| 8                             | 11    | 22    | 6     | 12    | 9     | 4        | 4        | MBC3205                                                                                                          | 8036    | 0.094192823    | 0.011112989    | 1.833333333 | 3.666666667 | 49         |
| 12                            | 10    | 22    | 6     | 12    | 6     | 34       | 16       | tumor rejection antigen (gp96) 1                                                                                 | 192374  | 0.121970405    | 0.011112989    | 1.666666667 | 3.666666667 | 45         |
| 2                             | 30    | 60    | 17    | 1     | 1     |          |          | period homolog 1 (Drosophila)                                                                                    | 445534  | 0.019336242    | 4.25688E-05    | 1.764705882 | 3.529411765 | 79         |
| 1                             | 10    | 14    | 4     | 5     | 7     | 18       | 20       | superoxide dismutase 1, soluble (amyotrophic lateral sclerosis 1 (adult))                                        | 443914  | 0.060911471    | 0.047744557    | 2.5         | 3.5         | 33         |
| 6                             | 10    | 14    | 4     | 4     | 8     |          |          | ATP-binding cassette, sub-family A (ABC1), member 7                                                              | 134514  | 0.060911471    | 0.047744557    | 2.5         | 3.5         | 33         |
| 2                             | 9     | 14    | 4     | 2     | 8     | 6        |          | cut-like 1, CCAAT displacement protein (Drosophila)                                                              | 438974  | 0.087069068    | 0.047744557    | 2.25        | 3.5         | 30         |
| 8                             | 7     | 14    | 4     | 16    | 12    | 10       | 12       | proteasome (prosome, macropain) subunit, beta type, 1                                                            | 352768  | 0.160937588    | 0.047744557    | 1.75        | 3.5         | 46         |
| 6                             | 6     | 14    | 4     | 5     | 6     | 8        |          | methionine-tRNA synthetase                                                                                       | 355867  | 0.204953666    | 0.047744557    | 1.5         | 3.5         | 28         |
| 2                             | 16    | 24    | 7     | 13    | 12    | 6        | 14       | NACHT, leucine rich repeat and PYD containing 1                                                                  | 511937  | 0.029083744    | 0.010258664    | 2.285714286 | 3.428571429 | 60         |
| 1                             | 11    | 24    | 7     | 12    | 12    | 2        | 10       | chromosome 6 open reading frame 49                                                                               | 525899  | 0.121178345    | 0.010258664    | 1.571428571 | 3.428571429 | 54         |
| 8                             | 13    | 10    | 3     | 3     | 9     | 2        | 2        | zinc finger protein 333                                                                                          | 343604  | 0.008498491    | 0.02843683     | 4.333333333 | 3.333333333 | 33         |
| 3                             | 8     | 10    | 3     | 6     | 6     | 2        |          | chromosome 14 open reading frame 147                                                                             | 353161  | 0.080371477    | 0.02843683     | 2.666666667 | 3.333333333 | 28         |
| 2                             | 8     | 10    | 3     | 10    | 12    | 4        | 4        | mitochondrial ribosomal protein L33                                                                              | 14454   | 0.080371477    | 0.02843683     | 2.666666667 | 3.333333333 | 38         |
| 10                            | 14    | 20    | 6     | 11    | 11    | 14       | 10       | serine/threonine kinase 10                                                                                       | 16134   | 0.036808048    | 0.020695094    | 2.333333333 | 3.333333333 | 52         |
| 4                             | 6     | 10    | 3     | 8     | 10    | 8        | 4        | Transcribed sequence with strong similarity to protein ref:NP_060755.1 (H.sapiens) mitochondrial ribosomal prote | 6118    | 0.163863786    | 0.02843683     | 2           | 3.333333333 | 32         |
| 1                             | 5     | 10    | 3     | 4     | 9     | 6        |          | integrin, beta 3 (platelet glycoprotein IIIa, antigen CD61)                                                      | 87149   | 0.218617324    | 0.02843683     | 1.666666667 | 3.333333333 | 26         |
| 3                             | 5     | 10    | 3     | 4     | 9     | 6        |          | epithelial membrane protein 2                                                                                    | 356835  | 0.218617324    | 0.02843683     | 1.666666667 | 3.333333333 | 26         |
| 1                             | 5     | 10    | 3     | 7     | 10    | 8        | 2        | chromosome 15 open reading frame 12                                                                              | 513041  | 0.218617324    | 0.02843683     | 1.666666667 | 3.333333333 | 30         |
| 7                             | 17    | 36    | 11    | 4     | 7     | 2        | 2        | insulin receptor substrate 2                                                                                     | 143648  | 0.079755482    | 0.00224736     | 1.545454545 | 3.272727273 | 57         |
| 8                             | 12    | 16    | 5     | 9     | 5     | 14       | 10       | RNA binding motif protein 8A                                                                                     | 10283   | 0.047039459    | 0.04221838     | 2.4         | 3.2         | 39         |
| 8                             | 12    | 16    | 5     | 7     | 5     | 10       | 8        | tumor necrosis factor, alpha-induced protein 3                                                                   | 211600  | 0.047039459    | 0.04221838     | 2.4         | 3.2         | 37         |
| 9                             | 48    | 100   | 32    | 63    | 55    | 30       | 30       | lymphocyte-specific protein 1                                                                                    | 56729   | 0.017959718    | 1.005E-06      | 1.5         | 3.125       | 248        |

|    |     |     |    |    |    |     |     |                                                                                                                    |        |             |             |             |             |     |
|----|-----|-----|----|----|----|-----|-----|--------------------------------------------------------------------------------------------------------------------|--------|-------------|-------------|-------------|-------------|-----|
| 1  | 14  | 28  | 9  | 19 | 12 | 14  | 30  | chemokine (C-X3-C motif) receptor 1                                                                                | 78913  | 0.097180728 | 0.00855289  | 1.555555556 | 3.111111111 | 68  |
| 4  | 26  | 6   | 2  | 8  | 18 | 4   |     | signal-regulatory protein beta 1                                                                                   | 194784 | 1.38869E-06 | 0.233114486 | 13          | 3           | 57  |
| 10 | 10  | 6   | 2  | 9  | 7  | 8   | 4   | F-box only protein 9                                                                                               | 388387 | 0.016045141 | 0.233114486 | 5           | 3           | 31  |
| 3  | 8   | 6   | 2  | 10 | 9  | 2   |     | Kruppel-like factor 4 (gut)                                                                                        | 376206 | 0.043812478 | 0.233114486 | 4           | 3           | 32  |
| 4  | 8   | 6   | 2  | 5  | 11 | 4   | 2   | golgii phosphoprotein 2                                                                                            | 352662 | 0.043812478 | 0.233114486 | 4           | 3           | 29  |
| 6  | 7   | 6   | 2  | 5  | 8  | 6   | 4   | hypothetical protein FLJ20533                                                                                      | 106650 | 0.070142406 | 0.233114486 | 3.5         | 3           | 25  |
| 6  | 6   | 6   | 2  | 10 | 4  | 6   | 4   | ATP-binding cassette, sub-family E (OABP), member 1                                                                | 12013  | 0.109176466 | 0.233114486 | 3           | 3           | 25  |
| 3  | 17  | 18  | 6  | 7  | 8  | 12  | 4   | MRNA: cDNA DKFZp686M14190 (from clone DKFZp686M14190)                                                              | 380801 | 0.011961176 | 0.037225469 | 2.833333333 | 3           | 47  |
| 3  | 11  | 12  | 4  | 4  | 7  | 6   | 12  | chromosome 19 open reading frame 22                                                                                | 389956 | 0.04150542  | 0.087442381 | 2.75        | 3           | 32  |
| 9  | 10  | 12  | 4  | 2  | 4  | 6   | 10  | DKFZP434C171 protein                                                                                               | 132994 | 0.060911471 | 0.087442381 | 2.5         | 3           | 26  |
| 4  | 9   | 12  | 4  | 7  | 8  | 12  | 4   | HSPC038 protein                                                                                                    | 374485 | 0.087069068 | 0.087442381 | 2.25        | 3           | 34  |
| 4  | 8   | 12  | 4  | 7  | 4  | 10  | 4   | high-mobility group 20B                                                                                            | 406534 | 0.120630159 | 0.087442381 | 2           | 3           | 29  |
| 2  | 8   | 12  | 4  | 9  | 6  | 8   | 16  | v-rel reticuloendotheliosis viral oncogene homolog A, nuclear factor of kappa light polypeptide gene enhancer in B | 132594 | 0.120630159 | 0.087442381 | 2           | 3           | 33  |
| 4  | 8   | 12  | 4  | 9  | 5  | 6   | 14  | zinc finger RNA binding protein                                                                                    | 173518 | 0.120630159 | 0.087442381 | 2           | 3           | 32  |
| 7  | 4   | 6   | 2  | 12 | 5  |     | 4   | C2f protein                                                                                                        | 135643 | 0.234232933 | 0.233114486 | 2           | 3           | 26  |
| 7  | 17  | 30  | 10 | 3  | 13 | 26  | 18  | hypothetical protein FLJ31031                                                                                      | 107101 | 0.062627129 | 0.00775686  | 1.7         | 3           | 58  |
| 3  | 10  | 18  | 6  | 6  | 16 | 2   | 2   | transcription factor EB                                                                                            | 23391  | 0.121970405 | 0.037225469 | 1.666666667 | 3           | 47  |
| 8  | 6   | 12  | 4  | 9  | 5  | 4   | 4   | Rac/Cdc42 guanine nucleotide exchange factor (GEF) 6                                                               | 372000 | 0.204953666 | 0.087442381 | 1.5         | 3           | 30  |
| 6  | 6   | 12  | 4  | 6  | 10 | 4   | 6   | peptidylprolyl isomerase F (cyclophilin F)                                                                         | 381072 | 0.204953666 | 0.087442381 | 1.5         | 3           | 32  |
| 7  | 15  | 26  | 9  | 15 | 14 | 14  | 28  | mitochondrial ribosomal protein L20                                                                                | 182698 | 0.077697542 | 0.014983244 | 1.666666667 | 2.888888889 | 66  |
| 1  | 11  | 14  | 5  | 7  | 4  | 10  | 6   | surfeit 1                                                                                                          | 423854 | 0.066448853 | 0.074772337 | 2.2         | 2.8         | 34  |
| 6  | 11  | 14  | 5  | 7  | 5  | 4   | 4   | NADH dehydrogenase (ubiquinone) 1 beta subcomplex, 1, 7kDa                                                         | 183435 | 0.066448853 | 0.074772337 | 2.2         | 2.8         | 35  |
| 12 | 40  | 56  | 20 | 10 | 15 | 16  | 16  | nuclear factor of kappa light polypeptide gene enhancer in B-cells inhibitor, alpha                                | 81328  | 0.003594247 | 0.000598135 | 2           | 2.8         | 113 |
| 3  | 9   | 14  | 5  | 9  | 5  | 8   | 8   | chromosome 14 open reading frame 39                                                                                | 335754 | 0.121970405 | 0.074772337 | 1.8         | 2.8         | 35  |
| 6  | 8   | 14  | 5  | 6  | 8  | 4   | 2   | calmodulin binding transcription activator 1                                                                       | 253254 | 0.156914091 | 0.074772337 | 1.6         | 2.8         | 34  |
| 5  | 20  | 22  | 8  | 9  | 11 | 6   | 10  | spinstar-like                                                                                                      | 379091 | 0.011501726 | 0.028898856 | 2.5         | 2.75        | 59  |
| 2  | 27  | 30  | 11 | 24 | 24 | 16  | 20  | ADP-ribosylation factor-like 10A                                                                                   | 424552 | 0.004338079 | 0.011963892 | 2.454545455 | 2.727272727 | 101 |
| 5  | 11  | 8   | 3  | 3  | 6  | 14  | 6   | component of oligomeric golgi complex 1                                                                            | 283109 | 0.022122838 | 0.184990913 | 3.666666667 | 2.666666667 | 27  |
| 8  | 10  | 8   | 3  | 4  | 4  | 4   | 4   | ATP synthase, H+ transporting, mitochondrial F0 complex, subunit f, isoform 2                                      | 235557 | 0.034785507 | 0.184990913 | 3.333333333 | 2.666666667 | 25  |
| 3  | 7   | 8   | 3  | 1  | 11 | 4   | 8   | general transcription factor IIB                                                                                   | 258561 | 0.116974743 | 0.184990913 | 2.333333333 | 2.666666667 | 26  |
| 5  | 20  | 24  | 9  | 28 | 16 | 12  | 10  | chromosome 20 open reading frame 24                                                                                | 184062 | 0.01854177  | 0.025481165 | 2.222222222 | 2.666666667 | 85  |
| 6  | 6   | 8   | 3  | 7  | 7  | 14  | 8   | hypothetical protein from EUROIMAGE 1977056                                                                        | 8694   | 0.163863786 | 0.184990913 | 2           | 2.666666667 | 27  |
| 3  | 6   | 8   | 3  | 7  | 8  |     |     | hypothetical protein MGC15619                                                                                      | 334637 | 0.163863786 | 0.184990913 | 2           | 2.666666667 | 28  |
| 2  | 6   | 8   | 3  | 2  | 18 |     | 10  | 1-aminocyclopropane-1-carboxylate synthase                                                                         | 126706 | 0.163863786 | 0.184990913 | 2           | 2.666666667 | 33  |
| 4  | 11  | 16  | 6  | 6  | 7  | 6   | 8   | hypothetical protein FLJ20647                                                                                      | 234149 | 0.094192832 | 0.064281232 | 1.833333333 | 2.666666667 | 38  |
| 11 | 16  | 24  | 9  | 11 | 18 | 6   | 4   | MRNA: cDNA DKFZp762M127 (from clone DKFZp762M127)                                                                  | 12853  | 0.060864477 | 0.025481165 | 1.777777778 | 2.666666667 | 66  |
| 1  | 10  | 16  | 6  | 10 | 15 | 12  | 20  | KIAA0754 protein                                                                                                   | 159183 | 0.121970405 | 0.064281232 | 1.666666667 | 2.666666667 | 49  |
| 18 | 9   | 16  | 6  | 4  | 4  | 4   | 2   | Clone IMAGE:5302006, mRNA                                                                                          | 351680 | 0.152555311 | 0.064281232 | 1.5         | 2.666666667 | 31  |
| 8  | 9   | 16  | 6  | 17 | 9  | 12  | 12  | heterogeneous nuclear ribonucleoprotein M                                                                          | 385766 | 0.152555311 | 0.064281232 | 1.5         | 2.666666667 | 49  |
| 3  | 20  | 26  | 10 | 18 | 20 | 2   | 2   | frequently rearranged in advanced T-cell lymphomas 2                                                               | 140720 | 0.027829483 | 0.022487415 | 2           | 2.6         | 81  |
| 2  | 15  | 26  | 10 | 7  | 7  | 12  | 12  | cytochrome c-1                                                                                                     | 289271 | 0.097180692 | 0.022487415 | 1.5         | 2.6         | 52  |
| 2  | 27  | 28  | 11 | 20 | 17 | 12  | 22  | tubulin, alpha, ubiquitous                                                                                         | 446608 | 0.004338079 | 0.019864752 | 2.454545455 | 2.545454545 | 89  |
| 2  | 10  | 10  | 4  | 7  | 3  | 14  | 4   | LOC388789 (LOC388789), mRNA                                                                                        | 349092 | 0.060911471 | 0.150996188 | 2.5         | 2.5         | 29  |
| 2  | 8   | 10  | 4  | 5  | 7  | 12  | 2   | UBX domain containing 1                                                                                            | 435255 | 0.120630159 | 0.150996188 | 2           | 2.5         | 29  |
| 5  | 8   | 10  | 4  | 7  | 3  | 8   | 6   | putative membrane protein                                                                                          | 93832  | 0.120630159 | 0.150996188 | 2           | 2.5         | 27  |
| 3  | 7   | 10  | 4  | 6  | 7  | 12  |     | translocase of inner mitochondrial membrane 17 homolog B (yeast)                                                   | 19105  | 0.160937588 | 0.150996188 | 1.75        | 2.5         | 29  |
| 6  | 7   | 10  | 4  | 7  | 5  | 6   | 2   | polymerase (RNA) III (DNA directed) polypeptide H (22.9kD)                                                         | 202505 | 0.160937588 | 0.150996188 | 1.75        | 2.5         | 28  |
| 7  | 7   | 10  | 4  | 7  | 7  | 8   | 4   | chromosome 10 open reading frame 45                                                                                | 103378 | 0.160937588 | 0.150996188 | 1.75        | 2.5         | 30  |
| 8  | 7   | 10  | 4  | 5  | 5  | 16  | 22  | retinoblastoma binding protein 6                                                                                   | 188553 | 0.160937588 | 0.150996188 | 1.75        | 2.5         | 26  |
| 10 | 6   | 10  | 4  | 10 | 9  | 8   | 6   | casein kinase 1, delta                                                                                             | 378918 | 0.204953666 | 0.150996188 | 1.5         | 2.5         | 34  |
| 2  | 6   | 10  | 4  | 11 | 7  |     |     | PDZ and LIM domain 7 (enigma)                                                                                      | 436339 | 0.204953666 | 0.150996188 | 1.5         | 2.5         | 33  |
| 7  | 6   | 10  | 4  | 8  | 10 | 4   | 16  | splicing factor YTS21-B                                                                                            | 86405  | 0.204953666 | 0.150996188 | 1.5         | 2.5         | 33  |
| 18 | 54  | 88  | 36 | 22 | 41 | 20  | 12  | potassium channel tetramerisation domain containing 12                                                             | 109438 | 0.013832754 | 0.000126171 | 1.5         | 2.444444444 | 44  |
| 7  | 11  | 12  | 5  | 8  | 11 |     |     | ubiquitin-conjugating enzyme E2D 1 (UBC4/5 homolog, yeast)                                                         | 129683 | 0.066448853 | 0.12553086  | 2.2         | 2.4         | 41  |
| 1  | 21  | 24  | 10 | 16 | 13 | 22  | 26  | CDNA FLJ46261 fis. clone TEST14025062                                                                              | 447456 | 0.020528381 | 0.036580346 | 2.1         | 2.4         | 72  |
| 1  | 21  | 24  | 10 | 16 | 13 | 22  | 26  | Similar to eukaryotic initiation factor 5A isoform 1 variant A (LOC143244), mRNA                                   | 511828 | 0.020528381 | 0.036580346 | 2.1         | 2.4         | 72  |
| 4  | 9   | 12  | 5  | 6  | 4  | 8   | 4   | protein tyrosine phosphatase, non-receptor type 12                                                                 | 62     | 0.121970405 | 0.12553086  | 1.8         | 2.4         | 30  |
| 2  | 9   | 12  | 5  | 4  | 5  | 6   | 4   | tetratricopeptide repeat domain 15                                                                                 | 5008   | 0.121970405 | 0.12553086  | 1.8         | 2.4         | 29  |
| 1  | 9   | 12  | 5  | 8  | 5  |     |     | hypothetical protein FLJ20701                                                                                      | 424598 | 0.121970405 | 0.12553086  | 1.8         | 2.4         | 33  |
| 3  | 9   | 12  | 5  | 8  | 9  | 4   | 4   | nucleoporin 93kDa                                                                                                  | 295014 | 0.121970405 | 0.12553086  | 1.8         | 2.4         | 37  |
| 5  | 8   | 12  | 5  | 10 | 10 | 6   | 26  | splicing factor 3a, subunit 3, 60kDa                                                                               | 77897  | 0.156914091 | 0.12553086  | 1.6         | 2.4         | 39  |
| 8  | 25  | 26  | 11 | 24 | 12 |     | 4   | hypothetical protein DKFZp434L142                                                                                  | 325833 | 0.00867431  | 0.032015769 | 2.272727273 | 2.363636364 | 85  |
| 3  | 40  | 28  | 12 | 15 | 18 | 4   | 12  | CCAAT/enhancer binding protein (C/EBP), beta                                                                       | 99029  | 4.50825E-05 | 0.028085432 | 3.333333333 | 2.333333333 | 99  |
| 1  | 18  | 14  | 6  | 19 | 9  | 10  |     | arrestin, beta 2                                                                                                   | 435811 | 0.007969293 | 0.105715556 | 3           | 2.333333333 | 59  |
| 10 | 9   | 14  | 6  | 18 | 8  | 12  | 6   | signal peptidase 12kDa                                                                                             | 11125  | 0.152555311 | 0.105715556 | 1.5         | 2.333333333 | 48  |
| 5  | 9   | 14  | 6  | 6  | 6  | 8   | 6   | DEAD (Asp-Glu-Ala-Asp) box polypeptide 54                                                                          | 203581 | 0.152555311 | 0.105715556 | 1.5         | 2.333333333 | 34  |
| 13 | 9   | 14  | 6  | 10 | 8  | 6   | 6   | ROD1 regulator of differentiation 1 (S. pombe)                                                                     | 374634 | 0.152555311 | 0.105715556 | 1.5         | 2.333333333 | 40  |
| 6  | 30  | 30  | 13 | 13 | 8  | 8   | 6   | major histocompatibility complex, class II, DQ beta 2                                                              | 375115 | 0.004118211 | 0.024687742 | 2.307692308 | 2.307692308 | 79  |
| 1  | 80  | 106 | 46 | 74 | 67 | 146 | 104 | Transcribed sequence with weak similarity to protein pdb:2RMA (H.sapiens) S Chain S, Cyclophilin A                 | 404768 | 0.000694046 | 7.14658E-05 | 1.739130435 | 2.304347826 | 320 |
| 2  | 80  | 106 | 46 | 74 | 67 | 146 | 104 | Similar to peptidyl-Pro cis trans isomerase (LOC391532), mRNA                                                      | 177285 | 0.000694046 | 7.14658E-05 | 1.739130435 | 2.304347826 | 320 |
| 11 | 27  | 34  | 15 | 18 | 27 | 8   | 4   | N-acylphosphingosine amidohydrolase (acid ceramidase)-like                                                         | 264330 | 0.022286511 | 0.019175658 | 1.8         | 2.266666667 | 104 |
| 9  | 47  | 70  | 31 | 20 | 34 | 44  | 36  | Fc fragment of IgG, low affinity IIa, receptor for (CD16)                                                          | 372679 | 0.01745958  | 0.001278764 | 1.516129032 | 2.258064516 | 167 |
| 2  | 14  | 18  | 8  | 7  | 6  | 18  | 8   | chromosome 19 open reading frame 20                                                                                | 370411 | 0.076008493 | 0.076989722 | 1.75        | 2.25        | 44  |
| 6  | 68  | 80  | 36 | 50 | 42 | 46  | 60  | attractin                                                                                                          | 373838 | 0.000540168 | 0.000742987 | 1.888888889 | 2.222222222 | 236 |
| 3  | 28  | 40  | 18 | 28 | 27 | 14  | 20  | MARCKS-like protein                                                                                                | 75061  | 0.039841838 | 0.013266023 | 1.555555556 | 2.222222222 | 121 |
| 12 | 14  | 20  | 9  | 12 | 7  | 16  | 18  | ATP synthase, H+ transporting, mitochondrial F1 complex, alpha subunit, isoform 1, cardiac muscle                  | 298280 | 0.097180728 | 0.06632969  | 1.555555556 | 2.222222222 | 52  |
| 10 | 32  | 42  | 19 | 7  | 5  | 16  | 12  | inhibitor of DNA binding 2, dominant negative helix-loop-helix protein                                             | 180919 | 0.021364439 | 0.011759592 | 1.684210526 | 2.210256316 | 84  |
| 12 | 110 | 152 | 69 | 69 | 92 | 52  | 26  | integrin, beta 2 (antigen CD18 (p95), lymphocyte function-associated antigen 1; macrophage antigen 1 (mac-1) de    | 375957 | #NUM!       | 6.75058E-06 | 1.594202899 | 2.202898551 | 416 |
| 3  | 31  | 30  | 14 | 21 | 21 | 26  | 28  | Transcribed sequence with strong similarity to protein pir-S02061 (H.sapiens) S02061 heterogeneous ribonuclea      | 374637 | 0.004697036 | 0.033370075 | 2.214285714 | 2.142857143 | 102 |
| 1  | 76  | 100 | 47 | 63 | 47 | 86  | 76  | ribosomal protein L12                                                                                              | 408054 | 0.002303002 | 0.000342667 | 1.617021277 | 2.127659574 | 283 |
| 32 | 105 | 126 | 60 | 94 | 86 | 162 | 122 | peptidylprolyl isomerase A (cyclophilin A)                                                                         | 356331 | 0.000125496 | 8.63327E-05 | 1.75        | 2.1         | 408 |
| 8  | 51  | 56  | 27 | 29 | 52 | 78  | 46  | FLJ20758 protein                                                                                                   | 323489 | 0.002187727 | 0.006885787 | 1.888888889 | 2.074074074 | 187 |
| 2  | 13  | 8   | 4  | 16 | 11 | 4   | 8   | ATP synthase, H+ transporting, mitochondrial F0 complex, subunit e                                                 | 85539  | 0.018070219 | 0.24142722  | 3.25        | 2           | 48  |
| 7  | 16  | 10  | 5  | 10 | 12 | 8   | 8   | v-raf-1 murine leukemia viral oncogene homolog 1                                                                   | 257266 | 0.009644588 | 0.197061519 | 3.2         | 2           | 48  |
| 6  | 15  | 10  | 5  | 4  | 5  | 10  | 8   | ceroid-lipofuscinosis, neuronal 8 (epilepsy, progressive with mental retardation)                                  | 127675 | 0.014705413 | 0.19        |             |             |     |

|    |     |     |     |     |     |     |     |                                                                                                                      |        |             |             |             |             |      |
|----|-----|-----|-----|-----|-----|-----|-----|----------------------------------------------------------------------------------------------------------------------|--------|-------------|-------------|-------------|-------------|------|
| 4  | 9   | 6   | 3   | 6   | 4   |     | 2   | interferon gamma receptor 1                                                                                          | 180866 | 0.053548565 | 0.304232148 | 3           | 2           | 25   |
| 3  | 6   | 4   | 2   | 5   | 10  |     | 2   | chromosome 2 open reading frame 24                                                                                   | 4973   | 0.109176466 | 0.402543918 | 3           | 2           | 25   |
| 2  | 11  | 8   | 4   | 3   | 5   |     | 6   | KIAA1244                                                                                                             | 194408 | 0.04150542  | 0.241427222 | 2.75        | 2           | 27   |
| 4  | 13  | 10  | 5   | 17  | 7   | 14  | 4   | Transcribed sequence with strong similarity to protein pir-S12566 (H.sapiens) S12566 translation initiation factor e | 381018 | 0.032546075 | 0.197061519 | 2.6         | 2           | 47   |
| 3  | 23  | 18  | 9   | 7   | 9   | 22  | 16  | hypothetical protein LOC148206                                                                                       | 135553 | 0.006479414 | 0.100477448 | 2.555555556 | 2           | 57   |
| 3  | 10  | 8   | 4   | 7   | 17  | 4   | 2   | NADH dehydrogenase (ubiquinone) 1 beta subcomplex, 5, 16kDa                                                          | 19236  | 0.060911471 | 0.241427222 | 2.5         | 2           | 42   |
| 6  | 10  | 8   | 4   | 6   | 8   |     | 4   | hepatocellular carcinoma-associated antigen 112                                                                      | 12126  | 0.060911471 | 0.241427222 | 2.5         | 2           | 32   |
| 12 | 5   | 4   | 2   | 6   | 10  | 2   | 4   | peroxiredoxin 3                                                                                                      | 397062 | 0.163863846 | 0.402543918 | 2.5         | 2           | 25   |
| 5  | 12  | 10  | 5   | 10  | 9   | 2   | 16  | histone deacetylase 1                                                                                                | 88556  | 0.047039459 | 0.197061519 | 2.4         | 2           | 41   |
| 4  | 30  | 26  | 13  | 19  | 14  | 6   | 8   | ribosomal protein S6 kinase, 90kDa, polypeptide 4                                                                    | 105584 | 0.004118211 | 0.0568021   | 2.307692308 | 2           | 89   |
| 10 | 11  | 10  | 5   | 5   | 11  | 6   | 4   | thyroid hormone receptor interactor 6                                                                                | 380230 | 0.066448853 | 0.197061519 | 2.2         | 2           | 37   |
| 10 | 11  | 10  | 5   | 12  | 11  | 6   | 6   | nuclear receptor coactivator 3                                                                                       | 382168 | 0.066448853 | 0.197061519 | 2.2         | 2           | 44   |
| 6  | 13  | 12  | 6   | 6   | 7   | 4   | 8   | jun D proto-oncogene                                                                                                 | 2780   | 0.051562465 | 0.163827327 | 2.166666667 | 2           | 38   |
| 9  | 23  | 22  | 11  | 22  | 24  | 8   | 16  | zinc finger protein 106 homolog (mouse)                                                                              | 188199 | 0.016542507 | 0.074943673 | 2.090909091 | 2           | 91   |
| 11 | 38  | 38  | 19  | 25  | 26  | 26  | 38  | glutathione S-transferase subunit 13 homolog                                                                         | 390667 | 0.004372041 | 0.026225016 | 2           | 2           | 127  |
| 7  | 18  | 18  | 9   | 22  | 11  | 24  | 14  | APEX nuclease (multifunctional DNA repair enzyme) 1                                                                  | 73722  | 0.034750772 | 0.100477448 | 2           | 2           | 69   |
| 2  | 12  | 12  | 6   | 10  | 24  | 18  | 14  | annexin A6                                                                                                           | 412117 | 0.07060188  | 0.163827327 | 2           | 2           | 58   |
| 9  | 8   | 8   | 4   | 12  | 6   | 2   |     | KIAA0513 gene product                                                                                                | 301658 | 0.120630159 | 0.241427222 | 2           | 2           | 34   |
| 1  | 8   | 8   | 4   | 2   | 12  | 6   | 4   | KIAA0415 gene product                                                                                                | 505758 | 0.120630159 | 0.241427222 | 2           | 2           | 30   |
| 8  | 6   | 6   | 3   | 10  | 7   | 6   |     | protein phosphatase 1, regulatory (inhibitor) subunit 15B                                                            | 355489 | 0.163863786 | 0.304232148 | 2           | 2           | 29   |
| 5  | 6   | 6   | 3   | 5   | 10  | 8   | 4   | metaxin 1                                                                                                            | 247551 | 0.163863786 | 0.304232148 | 2           | 2           | 27   |
| 3  | 6   | 6   | 3   | 7   | 6   | 2   | 10  | immunoglobulin (CD79A) binding protein 1                                                                             | 3631   | 0.163863786 | 0.304232148 | 2           | 2           | 25   |
| 3  | 11  | 12  | 6   | 7   | 9   | 4   | 2   | arrestin, beta 1                                                                                                     | 112278 | 0.094192832 | 0.163827327 | 1.833333333 | 2           | 39   |
| 1  | 11  | 12  | 6   | 4   | 14  | 14  | 14  | Similar to MGC9515 protein (LOC388240), mRNA                                                                         | 454681 | 0.094192832 | 0.163827327 | 1.833333333 | 2           | 41   |
| 1  | 11  | 12  | 6   | 4   | 14  | 14  | 14  | Similar to MGC9515 protein (LOC400520), mRNA                                                                         | 528462 | 0.094192832 | 0.163827327 | 1.833333333 | 2           | 41   |
| 1  | 11  | 12  | 6   | 4   | 14  | 14  | 14  | Similar to nuclear pore complex interacting protein (LOC388237), mRNA                                                | 512290 | 0.094192832 | 0.163827327 | 1.833333333 | 2           | 41   |
| 1  | 11  | 12  | 6   | 4   | 14  | 14  | 14  | hypothetical protein MGC9515                                                                                         | 460311 | 0.094192832 | 0.163827327 | 1.833333333 | 2           | 41   |
| 1  | 11  | 12  | 6   | 4   | 14  | 14  | 14  | Similar to nuclear pore complex interacting protein (LOC400515), mRNA                                                | 528464 | 0.094192832 | 0.163827327 | 1.833333333 | 2           | 41   |
| 5  | 16  | 18  | 9   | 5   | 4   | 6   | 2   | urin (paired basic amino acid cleaving enzyme)                                                                       | 59242  | 0.060664477 | 0.100477448 | 1.777777778 | 2           | 43   |
| 1  | 21  | 24  | 12  | 14  | 14  | 18  | 18  | zinc finger protein 514                                                                                              | 512794 | 0.04110646  | 0.065136534 | 1.75        | 2           | 73   |
| 3  | 7   | 8   | 4   | 4   | 9   | 6   | 2   | similar to RIKEN cDNA B230118G17 gene                                                                                | 337228 | 0.160937588 | 0.241427222 | 1.75        | 2           | 28   |
| 5  | 19  | 22  | 11  | 13  | 15  | 6   | 12  | oxoglutarate (alpha-ketoglutarate) dehydrogenase (lipamide)                                                          | 168689 | 0.050660328 | 0.074943673 | 1.727272727 | 2           | 69   |
| 7  | 36  | 42  | 21  | 24  | 23  | 4   | 2   | leukocyte immunoglobulin-like receptor, subfamily B (with TM and ITIM domains), member 2                             | 306230 | 0.014671393 | 0.020530574 | 1.714285714 | 2           | 125  |
| 4  | 12  | 14  | 7   | 7   | 7   | 12  | 14  | purinergic receptor P2Y, G-protein coupled, 5                                                                        | 123464 | 0.095874812 | 0.137968848 | 1.714285714 | 2           | 40   |
| 9  | 10  | 12  | 6   | 5   | 10  |     |     | egf-like module containing, mucin-like, hormone receptor-like 2                                                      | 137354 | 0.121970405 | 0.163827327 | 1.666666667 | 2           | 37   |
| 2  | 10  | 12  | 6   | 2   | 8   | 2   | 4   | hypothetical protein FLJ20607                                                                                        | 345908 | 0.121970405 | 0.163827327 | 1.666666667 | 2           | 32   |
| 6  | 5   | 6   | 3   | 6   | 8   | 8   |     | HIMBA-inducible                                                                                                      | 15299  | 0.218617324 | 0.304232148 | 1.666666667 | 2           | 25   |
| 8  | 5   | 6   | 3   | 9   | 5   | 4   | 4   | secretory carrier membrane protein 4                                                                                 | 144980 | 0.218617324 | 0.304232148 | 1.666666667 | 2           | 25   |
| 11 | 8   | 10  | 5   | 7   | 10  | 6   | 4   | chromosome 14 open reading frame 170                                                                                 | 303775 | 0.156914091 | 0.197061519 | 1.6         | 2           | 35   |
| 3  | 8   | 10  | 5   | 9   | 6   | 10  | 8   | ubiquitin-conjugating enzyme E2D 2 (UBC4/5 homolog, yeast)                                                           | 108332 | 0.156914091 | 0.197061519 | 1.6         | 2           | 33   |
| 5  | 8   | 10  | 5   | 13  | 4   | 4   | 6   | phosphatidylinositol transfer protein, membrane-associated 1                                                         | 93837  | 0.156914091 | 0.197061519 | 1.6         | 2           | 35   |
| 9  | 8   | 10  | 5   | 11  | 9   | 2   | 8   | serologically defined breast cancer antigen 84                                                                       | 169992 | 0.156914091 | 0.197061519 | 1.6         | 2           | 38   |
| 3  | 22  | 28  | 14  | 16  | 5   | 2   | 8   | ninjurin 1                                                                                                           | 11342  | 0.05500954  | 0.049675609 | 1.571428571 | 2           | 71   |
| 5  | 11  | 14  | 7   | 7   | 11  | 2   | 4   | centromere protein B, 80kDa                                                                                          | 85004  | 0.121178345 | 0.137968848 | 1.571428571 | 2           | 43   |
| 6  | 25  | 32  | 16  | 20  | 20  | 16  | 6   | methyl-CpG binding domain protein 2                                                                                  | 25674  | 0.046647494 | 0.038262894 | 1.5625      | 2           | 97   |
| 15 | 12  | 16  | 8   | 8   | 13  | 12  | 16  | cancer susceptibility candidate 3                                                                                    | 350229 | 0.119916027 | 0.117305695 | 1.5         | 2           | 49   |
| 6  | 6   | 8   | 4   | 8   | 6   | 8   | 2   | aconitase 2, mitochondrial                                                                                           | 300463 | 0.204953666 | 0.241427222 | 1.5         | 2           | 28   |
| 11 | 57  | 62  | 32  | 34  | 55  | 86  | 62  | translocase of outer mitochondrial membrane 7 homolog (yeast)                                                        | 112318 | 0.002464874 | 0.008188245 | 1.78125     | 1.9375      | 209  |
| 5  | 52  | 52  | 27  | 23  | 49  | 72  | 44  | hypothetical protein LOC201725                                                                                       | 380920 | 0.001660825 | 0.014517921 | 1.925925926 | 1.925925926 | 177  |
| 18 | 85  | 90  | 47  | 69  | 56  | 82  | 90  | eukaryotic translation elongation factor 2                                                                           | 75309  | 0.000275661 | 0.002244447 | 1.808510638 | 1.914893617 | 302  |
| 4  | 27  | 34  | 18  | 18  | 15  | 20  | 22  | putative NFkB activating protein                                                                                     | 269592 | 0.048532472 | 0.042735354 | 1.5         | 1.888888889 | 95   |
| 9  | 29  | 24  | 13  | 8   | 8   | 22  | 18  | talin 1                                                                                                              | 375001 | 0.00574982  | 0.081738592 | 2.230769231 | 1.846153846 | 70   |
| 7  | 37  | 22  | 12  | 37  | 20  | 12  | 16  | RAVER1                                                                                                               | 205736 | 0.000161529 | 0.093731898 | 3.083333333 | 1.833333333 | 117  |
| 4  | 18  | 22  | 12  | 20  | 15  | 24  | 32  | splicing factor, arginine/serine-rich 11                                                                             | 443458 | 0.08030931  | 0.093731898 | 1.5         | 1.833333333 | 76   |
| 20 | 53  | 42  | 23  | 33  | 24  | 140 | 144 | ribosomal protein S27a                                                                                               | 311640 | 0.000221871 | 0.032687628 | 2.304347826 | 1.826086957 | 154  |
| 12 | 40  | 40  | 22  | 32  | 28  | 52  | 50  | splicing factor, arginine/serine-rich 5                                                                              | 166975 | 0.007364662 | 0.036804109 | 1.818181818 | 1.818181818 | 142  |
| 10 | 26  | 18  | 10  | 18  | 9   | 10  | 18  | H1 histone family, member X                                                                                          | 75307  | 0.003665462 | 0.124574181 | 2.6         | 1.8         | 72   |
| 5  | 18  | 18  | 10  | 21  | 16  | 16  | 16  | Src-like-adaptor 2                                                                                                   | 334489 | 0.048690517 | 0.124574181 | 1.8         | 1.8         | 74   |
| 7  | 33  | 34  | 19  | 25  | 23  | 16  | 18  | solute carrier family 25 (mitochondrial carrier; adenine nucleotide translocator), member 5                          | 79172  | 0.016822404 | 0.052837475 | 1.736842105 | 1.789473684 | 117  |
| 12 | 19  | 16  | 9   | 12  | 5   | 8   | 2   | c-Maf-inducing protein                                                                                               | 19597  | 0.025590339 | 0.144587702 | 2.111111111 | 1.777777778 | 53   |
| 8  | 16  | 16  | 9   | 13  | 14  | 10  | 8   | transmembrane 9 superfamily member 2                                                                                 | 298272 | 0.060664477 | 0.144587702 | 1.777777778 | 1.777777778 | 60   |
| 1  | 293 | 238 | 136 | 185 | 98  | 328 | 240 | protein tyrosine phosphatase, non-receptor type 14                                                                   | 512667 | #NUM!       | #NUM!       | 2.154411765 | 1.75        | 831  |
| 1  | 293 | 238 | 136 | 185 | 98  | 328 | 240 | xylulokinase homolog (H. influenzae)                                                                                 | 137580 | #NUM!       | #NUM!       | 2.154411765 | 1.75        | 831  |
| 2  | 15  | 14  | 8   | 14  | 14  | 8   | 8   | GLI pathogenesis-related 1 (glioma)                                                                                  | 511765 | 0.05823792  | 0.168803661 | 1.875       | 1.75        | 58   |
| 1  | 14  | 14  | 8   | 8   | 15  | 12  | 8   | citrate synthase                                                                                                     | 430606 | 0.076008493 | 0.168803661 | 1.75        | 1.75        | 52   |
| 3  | 14  | 14  | 8   | 9   | 6   | 22  | 28  | pan-hematopoietic expression                                                                                         | 271954 | 0.076008493 | 0.168803661 | 1.75        | 1.75        | 44   |
| 2  | 19  | 12  | 7   | 17  | 13  | 8   | 12  | caspase recruitment domain family, member 6                                                                          | 200242 | 0.009736914 | 0.198535194 | 2.714285714 | 1.714285714 | 62   |
| 10 | 11  | 12  | 7   | 7   | 8   | 8   | 4   | beta 5-tubulin                                                                                                       | 356729 | 0.121178345 | 0.198535194 | 1.571428571 | 1.714285714 | 39   |
| 10 | 11  | 12  | 7   | 6   | 7   | 2   | 2   | phosphatidylinositol binding clathrin assembly protein                                                               | 39252  | 0.121178345 | 0.198535194 | 1.571428571 | 1.714285714 | 37   |
| 7  | 27  | 22  | 13  | 35  | 26  | 26  | 18  | ubiquinol-cytochrome c reductase binding protein                                                                     | 131255 | 0.010858325 | 0.112917472 | 2.076923077 | 1.692307692 | 112  |
| 2  | 22  | 22  | 13  | 11  | 8   | 36  | 44  | sparc/osteonectin, cwcv and kazal-like domains proteoglycan (testican) 3                                             | 159425 | 0.042759326 | 0.112917472 | 1.692307692 | 1.692307692 | 65   |
| 1  | 22  | 22  | 13  | 11  | 7   | 36  | 44  | Similar to ribosomal protein S15; rat insulinoma gene (LOC401019), mRNA                                              | 426104 | 0.042759326 | 0.112917472 | 1.692307692 | 1.692307692 | 64   |
| 3  | 15  | 10  | 6   | 3   | 12  | 6   | 12  | hypothetical protein FLJ14154                                                                                        | 312841 | 0.025750044 | 0.235748592 | 2.5         | 1.666666667 | 41   |
| 4  | 12  | 10  | 6   | 2   | 8   | 12  | 16  | chromosome 10 open reading frame 86                                                                                  | 258798 | 0.07060188  | 0.235748592 | 2           | 1.666666667 | 33   |
| 3  | 31  | 30  | 18  | 34  | 23  | 22  | 36  | KIAA0101 gene product                                                                                                | 81892  | 0.020375818 | 0.080908615 | 1.722222222 | 1.666666667 | 121  |
| 1  | 31  | 30  | 18  | 32  | 23  | 20  | 36  | RAB3B, member RAS oncogene family                                                                                    | 123072 | 0.020375818 | 0.080908615 | 1.722222222 | 1.666666667 | 119  |
| 5  | 10  | 10  | 6   | 9   | 5   | 4   |     | hypothetical protein FLJ31121                                                                                        | 350194 | 0.121970405 | 0.235748592 | 1.666666667 | 1.666666667 | 35   |
| 12 | 10  | 10  | 6   | 11  | 16  | 4   | 10  | ankyrin repeat domain 11                                                                                             | 402727 | 0.121970405 | 0.235748592 | 1.666666667 | 1.666666667 | 48   |
| 11 | 18  | 20  | 12  | 14  | 10  | 30  | 30  | small nuclear ribonucleoprotein 70kDa polypeptide (RNP antigen)                                                      | 174051 | 0.08030931  | 0.129016429 | 1.5         | 1.666666667 | 64   |
| 2  | 9   | 10  | 6   | 8   | 2   | 14  | 12  | small nuclear ribonucleoprotein polypeptide G                                                                        | 436656 | 0.152555311 | 0.235748592 | 1.5         | 1.666666667 | 30   |
| 5  | 9   | 10  | 6   | 7   | 9   | 2   | 6   | interleukin 17 receptor                                                                                              | 129751 | 0.152555311 | 0.235748592 | 1.5         | 1.666666667 | 36   |
| 60 | 330 | 228 | 138 | 292 | 260 | 502 | 602 | ribosomal protein L10                                                                                                | 401929 | #NUM!       | #NUM!       | 2.391304348 | 1.652173913 | 1134 |
| 6  | 13  | 8   | 5   | 5   | 4   | 10  | 4   | prohibitin                                                                                                           | 75323  | 0.032546075 | 0.283572811 | 2.6         | 1.6         | 31   |
| 8  | 13  | 8   | 5   | 12  | 12  | 12  | 14  | chromosome 19 open reading frame 13                                                                                  | 8258   | 0.032546075 | 0.283572811 | 2.6         | 1.6         | 46   |
| 2  | 13  | 8   | 5   | 18  | 11  | 4   | 4   | zinc finger and BTB domain containing 5                                                                              | 3682   | 0.032546075 | 0.283572811 | 2.6         | 1.6         | 51   |
| 4  | 12  | 8   | 5   | 9   | 6   | 20  | 4   | BCL2-associated X protein                                                                                            | 159428 | 0.047039459 | 0.283572811 | 2.6         |             |      |

|    |    |    |    |    |    |     |     |                                                                                                                 |        |             |             |             |             |  |     |     |
|----|----|----|----|----|----|-----|-----|-----------------------------------------------------------------------------------------------------------------|--------|-------------|-------------|-------------|-------------|--|-----|-----|
| 2  | 12 | 8  | 5  | 5  | 10 |     | 2   | COMM domain containing 9                                                                                        | 279836 | 0.047039459 | 0.283572811 |             | 2.4         |  | 1.6 | 36  |
| 5  | 11 | 8  | 5  | 7  | 10 | 16  | 2   | U2 (RNU2) small nuclear RNA auxiliary factor 2                                                                  | 297629 | 0.066448853 | 0.283572811 |             | 2.2         |  | 1.6 | 37  |
| 6  | 10 | 8  | 5  | 5  | 8  | 8   | 2   | olfactomedin-like 2A                                                                                            | 357004 | 0.091422488 | 0.283572811 |             | 2           |  | 1.6 | 32  |
| 9  | 10 | 8  | 5  | 9  | 8  | 8   | 6   | axotrophin                                                                                                      | 5306   | 0.091422488 | 0.283572811 |             | 2           |  | 1.6 | 36  |
| 6  | 10 | 8  | 5  | 7  | 5  |     |     | erythrocyte membrane protein band 4.1-like 3                                                                    | 103839 | 0.091422488 | 0.283572811 |             | 2           |  | 1.6 | 31  |
| 2  | 9  | 8  | 5  | 7  | 6  | 4   |     | asparaginyl-tRNA synthetase                                                                                     | 427212 | 0.12197045  | 0.283572811 |             | 1.8         |  | 1.6 | 31  |
| 2  | 9  | 8  | 5  | 7  | 4  | 4   | 4   | Transcribed sequence with weak similarity to protein pir:A46010 (H.sapiens) A46010 X-linked retinopathy protein | 106015 | 0.12197045  | 0.283572811 |             | 1.8         |  | 1.6 | 29  |
| 3  | 9  | 8  | 5  | 6  | 8  | 8   | 8   | component of oligomeric golgi complex 4                                                                         | 208680 | 0.12197045  | 0.283572811 |             | 1.8         |  | 1.6 | 32  |
| 1  | 9  | 8  | 5  | 10 | 22 | 6   | 10  | NADH dehydrogenase (ubiquinone) Fe-S protein 6, 13kDa (NADH-coenzyme Q reductase)                               | 408257 | 0.12197045  | 0.283572811 |             | 1.8         |  | 1.6 | 50  |
| 2  | 8  | 8  | 5  | 8  | 8  | 18  | 14  | hypothetical protein FLJ21438                                                                                   | 136979 | 0.156914091 | 0.283572811 |             | 1.6         |  | 1.6 | 33  |
| 7  | 8  | 8  | 5  | 8  | 3  |     | 6   | ubiquilin 1                                                                                                     | 9589   | 0.156914091 | 0.283572811 |             | 1.6         |  | 1.6 | 28  |
| 10 | 15 | 16 | 10 | 14 | 7  | 20  | 10  | LIM and SH3 protein 1                                                                                           | 334851 | 0.097180692 | 0.169828161 |             | 1.5         |  | 1.6 | 54  |
| 3  | 15 | 14 | 9  | 7  | 3  | 14  | 2   | general transcription factor II, i                                                                              | 408507 | 0.077697542 | 0.195823667 | 1.666666667 | 1.555555556 |  |     | 41  |
| 3  | 15 | 14 | 9  | 13 | 6  | 12  | 8   | SCY1-like 1 (S. cerevisiae)                                                                                     | 238839 | 0.077697542 | 0.195823667 | 1.666666667 | 1.555555556 |  |     | 50  |
| 7  | 24 | 20 | 13 | 26 | 19 | 20  | 20  | DiGeorge syndrome critical region gene 8                                                                        | 350243 | 0.025763823 | 0.14894823  | 1.846153846 | 1.538461538 |  |     | 92  |
| 9  | 20 | 20 | 13 | 21 | 10 | 4   | 10  | low density lipoprotein receptor-related protein associated protein 1                                           | 75140  | 0.066483146 | 0.14894823  | 1.538461538 | 1.538461538 |  |     | 74  |
| 10 | 13 | 6  | 4  | 12 | 14 | 16  | 4   | HSPC182 protein                                                                                                 | 30026  | 0.018070219 | 0.347415346 |             | 3.25        |  | 1.5 | 46  |
| 4  | 13 | 6  | 4  | 11 | 9  | 8   | 8   | makorin, ring finger protein, 2                                                                                 | 279474 | 0.018070219 | 0.347415346 |             | 3.25        |  | 1.5 | 40  |
| 6  | 10 | 6  | 4  | 10 | 2  | 4   | 2   | carmitine palmitoyltransferase 1A (liver)                                                                       | 259785 | 0.060911471 | 0.347415346 |             | 2.5         |  | 1.5 | 29  |
| 6  | 10 | 6  | 4  | 3  | 5  | 24  | 18  | DKFZP586N0721 protein                                                                                           | 99843  | 0.060911471 | 0.347415346 |             | 2.5         |  | 1.5 | 25  |
| 5  | 10 | 6  | 4  | 13 | 9  | 10  | 12  | microtubule associated serine/threonine kinase 3                                                                | 173864 | 0.060911471 | 0.347415346 |             | 2.5         |  | 1.5 | 39  |
| 1  | 10 | 6  | 4  | 11 | 6  | 4   | 8   | hypothetical protein LOC283932                                                                                  | 421392 | 0.060911471 | 0.347415346 |             | 2.5         |  | 1.5 | 34  |
| 2  | 10 | 6  | 4  | 6  | 9  | 2   | 4   | TPA regulated locus                                                                                             | 429961 | 0.060911471 | 0.347415346 |             | 2.5         |  | 1.5 | 32  |
| 4  | 9  | 6  | 4  | 8  | 5  | 2   | 2   | selenoprotein X, 1                                                                                              | 279623 | 0.087069068 | 0.347415346 |             | 2.25        |  | 1.5 | 29  |
| 6  | 9  | 6  | 4  | 5  | 4  | 4   | 6   | zinc finger CCCH type domain containing 1                                                                       | 12646  | 0.087069068 | 0.347415346 |             | 2.25        |  | 1.5 | 25  |
| 2  | 9  | 6  | 4  | 9  | 2  |     | 4   | eukaryotic translation initiation factor 2B, subunit 4 delta, 67kDa                                             | 169474 | 0.087069068 | 0.347415346 |             | 2.25        |  | 1.5 | 27  |
| 1  | 8  | 6  | 4  | 6  | 5  | 4   |     | KIAA0953                                                                                                        | 227850 | 0.120630159 | 0.347415346 |             | 2           |  | 1.5 | 26  |
| 6  | 8  | 6  | 4  | 6  | 7  | 2   |     | LATS, large tumor suppressor, homolog 2 (Drosophila)                                                            | 78960  | 0.120630159 | 0.347415346 |             | 2           |  | 1.5 | 28  |
| 4  | 8  | 6  | 4  | 5  | 6  | 2   | 2   | breast cancer 1, early onset                                                                                    | 194143 | 0.120630159 | 0.347415346 |             | 2           |  | 1.5 | 26  |
| 5  | 8  | 6  | 4  | 5  | 9  | 4   | 4   | dishevelled, dsh homolog 3 (Drosophila)                                                                         | 381928 | 0.120630159 | 0.347415346 |             | 2           |  | 1.5 | 29  |
| 8  | 8  | 6  | 4  | 9  | 4  | 4   | 10  | Rab geranylgeranyltransferase, beta subunit                                                                     | 78948  | 0.120630159 | 0.347415346 |             | 2           |  | 1.5 | 28  |
| 5  | 14 | 12 | 8  | 11 | 10 | 8   | 10  | serine/threonine kinase receptor associated protein                                                             | 3727   | 0.076008493 | 0.226715597 |             | 1.75        |  | 1.5 | 49  |
| 5  | 14 | 12 | 8  | 11 | 6  | 4   | 10  | proteolipid protein 2 (colonic epithelium-enriched)                                                             | 77422  | 0.076008493 | 0.226715597 |             | 1.75        |  | 1.5 | 45  |
| 2  | 7  | 6  | 4  | 6  | 7  | 14  | 6   | CDNA FLJ30403 fis, clone BRACE2008480                                                                           | 224719 | 0.160937588 | 0.347415346 |             | 1.75        |  | 1.5 | 27  |
| 5  | 7  | 6  | 4  | 3  | 8  | 4   | 2   | COMM domain containing 5                                                                                        | 378713 | 0.160937588 | 0.347415346 |             | 1.75        |  | 1.5 | 25  |
| 6  | 7  | 6  | 4  | 6  | 11 | 6   | 8   | beclin 1 (coiled-coil, myosin-like BCL2 interacting protein)                                                    | 12272  | 0.160937588 | 0.347415346 |             | 1.75        |  | 1.5 | 31  |
| 4  | 13 | 12 | 8  | 5  | 10 | 6   | 16  | mitochondrial ribosomal protein L49                                                                             | 75859  | 0.09679665  | 0.226715597 |             | 1.625       |  | 1.5 | 42  |
| 12 | 82 | 78 | 52 | 52 | 63 | 108 | 108 | ribosomal protein L35a                                                                                          | 289093 | 0.002345143 | 0.030567929 | 1.576923077 |             |  | 1.5 | 288 |
| 6  | 12 | 12 | 8  | 16 | 15 | 8   | 14  | APG4 autophagy 4 homolog B (S. cerevisiae)                                                                      | 283610 | 0.119916027 | 0.226715597 |             | 1.5         |  | 1.5 | 57  |
| 10 | 6  | 6  | 4  | 5  | 7  | 8   | 10  | helicase with zinc finger domain                                                                                | 99437  | 0.204953666 | 0.347415346 |             | 1.5         |  | 1.5 | 25  |
