# Supplementary material
Source: PubMed Central journal article supplement (PMC552911)
Supplement: pnas_102_9_3423__3.pdf [file pnas_102_9_3423__3.pdf]

|    |    |    |    |    |    |    |    |                                                               |        |             |             |             |             |     |
|----|----|----|----|----|----|----|----|---------------------------------------------------------------|--------|-------------|-------------|-------------|-------------|-----|
| 12 | 18 | 14 | 27 | 21 | 21 | 8  | 10 | protective protein for beta-galactosidase (galactosialidosis) | 118126 | 0.049063927 | 0.042373629 | 0.666666667 | 0.518518519 | 94  |
| 6  | 20 | 20 | 30 | 23 | 25 | 8  | 16 | NPD014 protein                                                | 259412 | 0.042138283 | 0.077822578 | 0.666666667 | 0.666666667 | 108 |
| 8  | 16 | 16 | 24 | 25 | 37 | 10 | 28 | ubiquitin-activating enzyme E1-like                           | 16695  | 0.057475356 | 0.103604745 | 0.666666667 | 0.666666667 | 110 |
| 7  | 8  | 8  | 12 | 8  | 11 | 4  | 2  | glucosidase, alpha; neutral AB                                | 76847  | 0.12049788  | 0.206350894 | 0.666666667 | 0.666666667 | 43  |
| 5  | 8  | 8  | 12 | 7  | 6  | 10 | 8  | hypothetical protein DKFZp434N1923                            | 295866 | 0.12049788  | 0.206350894 | 0.666666667 | 0.666666667 | 37  |
| 6  | 6  | 6  | 9  | 3  | 10 | 6  | 2  | utrophin (homologous to dystrophin)                           | 250607 | 0.153110143 | 0.258364515 | 0.666666667 | 0.666666667 | 31  |
| 1  | 6  | 6  | 9  | 7  | 8  | 8  | 4  | mitochondrial ribosomal protein S34                           | 157160 | 0.153110143 | 0.258364515 | 0.666666667 | 0.666666667 | 33  |
| 6  | 6  | 6  | 9  | 6  | 5  |    | 4  | DKFZP564O123 protein                                          | 11449  | 0.153110143 | 0.258364515 | 0.666666667 | 0.666666667 | 29  |
| 1  | 4  | 4  | 6  | 8  | 8  |    | 2  | hematopoietically expressed homeobox                          | 118651 | 0.2054503   | 0.340599052 | 0.666666667 | 0.666666667 | 28  |
| 3  | 4  | 4  | 6  | 7  | 8  | 2  | 4  | retinol dehydrogenase 11 (all-trans and 9-cis)                | 226007 | 0.2054503   | 0.340599052 | 0.666666667 | 0.666666667 | 27  |
