# Supplementary material
Source: PubMed Central journal article supplement (PMC552911)

A

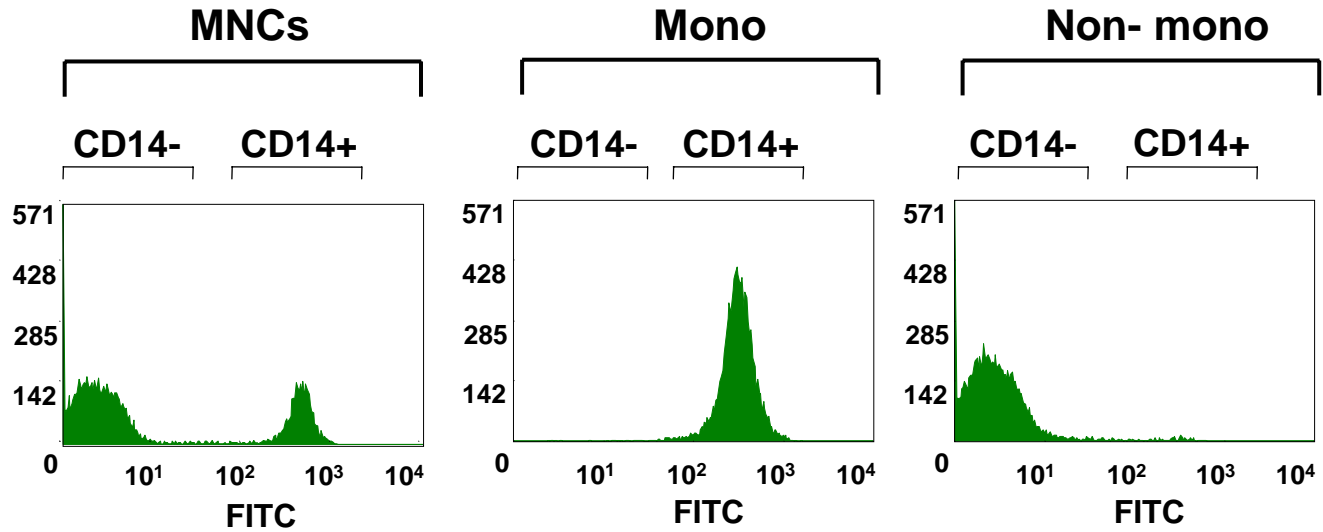

Supplement: pnas_102_9_3423__1.pdf [file pnas_102_9_3423__1.pdf]

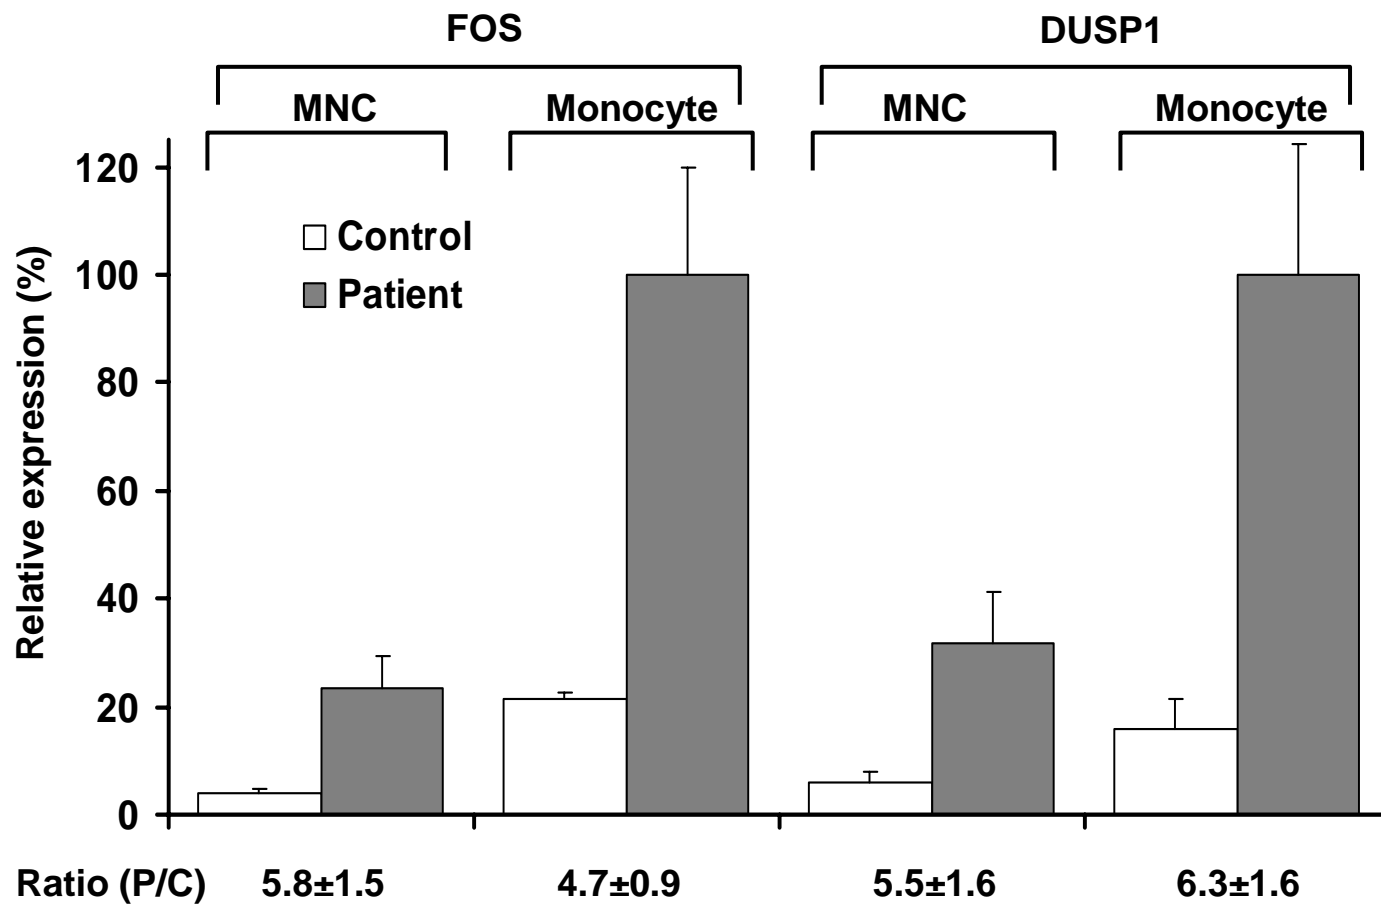

Supplement: pnas_102_9_3423__4.pdf [file pnas_102_9_3423__4.pdf]
